# Supplementary material
Source: Springer Nature journal article supplement (https://www.springermedizin.de/resource/supplementary/12885_2013_4279_MOESM1_ESM.pdf/9467362)

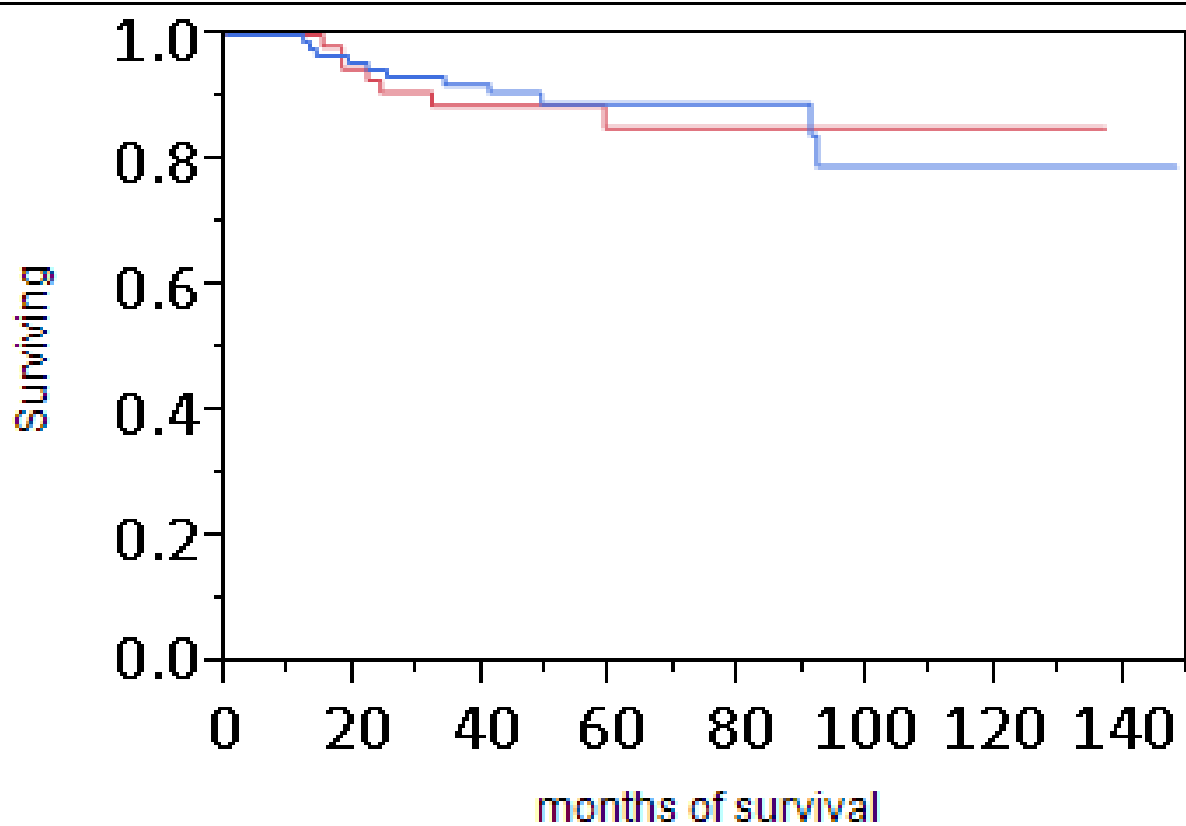

Supplement: MOESM1 [file 9467362]
